# Supplementary material for: Reduction of plasma glutathione in psychosis associated with schizophrenia and bipolar disorder in translational psychiatry
Source: PubMed Central journal article supplement (PMC5611744; doi:10.1038/tp.2017.178), 2017-08-22

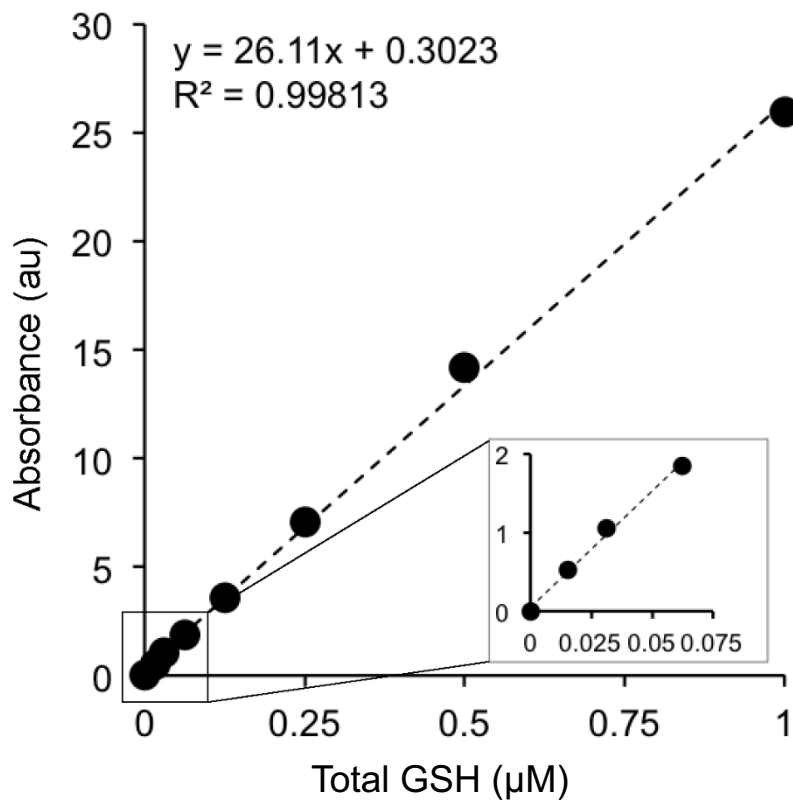

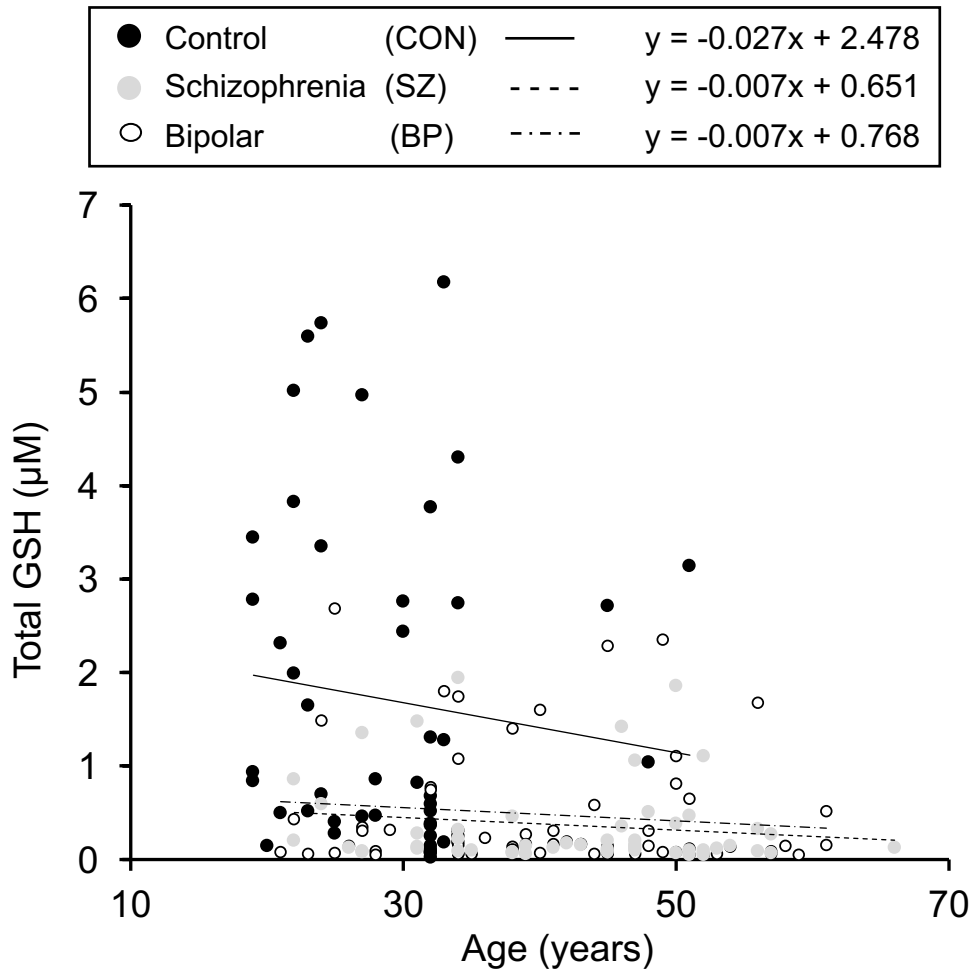

Supplement: tp2017178x1.pdf [file tp2017178x1.pdf]
